# Supplementary material
Source: PubMed Central journal article supplement (PMC7255340)

# THE LANCET

## Supplementary appendix

This appendix formed part of the original submission. We post it as supplied by the authors.

Supplement to: Krieger N, Chen JT, Waterman PD. Excess mortality in men and women in Massachusetts during the COVID-19 pandemic. *Lancet* 2020; published online May 27. [http://dx.doi.org/10.1016/S0140-6736\(20\)31234-4](http://dx.doi.org/10.1016/S0140-6736(20)31234-4).

Massachusetts weekly age-standardized death rates by sex, 2020 (solid) and 2015-2019 (dotted), Jan 8-April 14

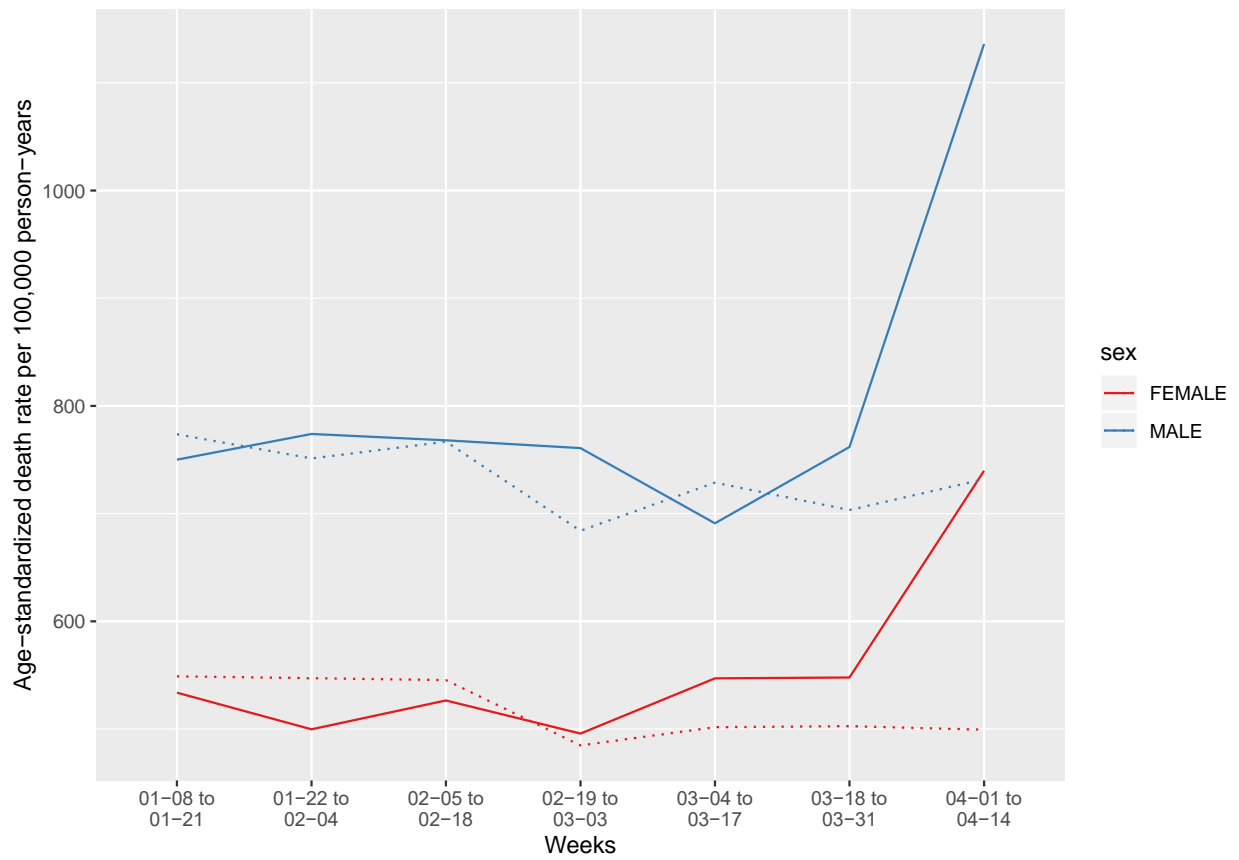

Supplement: mmc1.pdf [file mmc1.pdf]
